# Supplementary material for: Fibrates for the treatment of cholestatic itch (FITCH): study protocol for a randomized controlled trial
Source: Springer Nature journal article supplement (doi:10.1186/s13063-017-1966-8), 2017-05-23
Supplement: MOESM3 [file 12310000]

## Recruitment

Patients with primary biliary cholangitis or primary/ secondary sclerosing cholangitis attending (outpatient) clinics of participating departments of gastroenterology and hepatology, who report an itch intensity of  $\geq 5$  out of 10

## Eligibility

Investigator assesses eligibility, obtains informed consent and collects baseline data:  
VAS & 5D itch scores, LSDI2.0 questionnaire, blood withdrawal

## Exclusion

All patients that do not give informed consent and/or do not meet in- and exclusion criteria

Day 0: **Randomization**  
N=84

## Day 1: Start of treatment

N=42

Bezafibrate 400mg tablet q.d. for 21 days  
Patient diary

## Day 1: Start of treatment

N=42

Identical placebo tablet q.d. for 21 days  
Patient diary

Any **drop-out** will be substituted by inclusions of new study subjects

## Day 21: End of treatment

VAS & 5D itch scores, LSDI2.0 questionnaire, blood withdrawal

Any **drop-out** will not be substituted

## Day 35: Follow-up

VAS & 5D itch scores, LSDI2.0 questionnaire, blood withdrawal
